# Supplementary material
Source: PubMed Central journal article supplement (PMC9282630)
Supplement: 11655_2022_3674_MOESM1_ESM.pdf [file 11655_2022_3674_MOESM1_ESM.pdf]

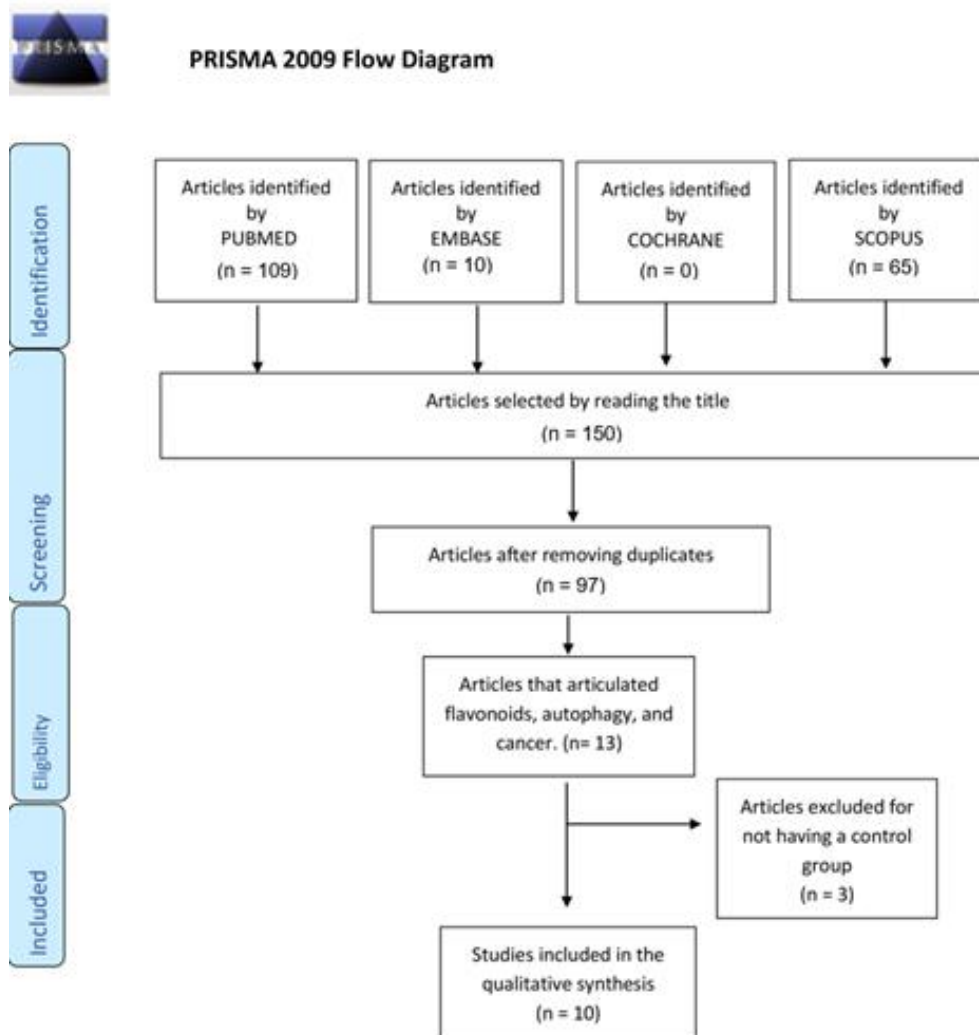

Appendix 1. Flow diagram of the study

## Appendix 2. Main characteristics of the selected studies

| Reference/Country                 | Flavonoid Type  | Studied cells                                      | Type of Cancer                            | Control Group                                                                                                | <i>In vivo or in vitro</i>  | Exposure Time | Temperature    | Outcome                                                                                                                                           |
|-----------------------------------|-----------------|----------------------------------------------------|-------------------------------------------|--------------------------------------------------------------------------------------------------------------|-----------------------------|---------------|----------------|---------------------------------------------------------------------------------------------------------------------------------------------------|
| An H-K, et al, 2014/ South Korea  | Isolated MML    | A549, NSCLC, and others                            | Lung, Breast, Colorectal and Osteosarcoma | Cells not treated with MML                                                                                   | <i>In vitro</i>             | 24 h          | 37 °C<br>98 °F | The results revealed a significant inhibition of cell proliferation by treatment with MML in a dose-dependent manner.                             |
| Aryal P, et al, 2014/ South Korea | Baicalein       | PC-3, MDA-MB-231, and DU145                        | Prostate and Breast                       | Cells not treated with Baicalein - positive control through chloroquine, CCCP, cisplatin and BacMam LC3B -FP | <i>In vitro</i>             | 24 h          | 37 °C<br>98 °F | Baicalein reduces mitochondrial membrane potential and induces cell cycle termination leading to death of human prostate and breast cancer cells. |
| Chen G, et al, 2012/ China        | ISL             | ACC- 2 and ACC-M                                   | Adenoid cystic carcinoma                  | DMSO                                                                                                         | <i>In vivo and in vitro</i> | 48 h          | 37 °C<br>98 °F | ISL treatment activates autophagy in ACC cells                                                                                                    |
| Chow S, et al, 2012/ Taiwan       | Wogonin         | NPC-TW076 and NPC-TWO39                            | Nasopharynx                               | Cells not treated with Wogonin                                                                               | <i>In vitro</i>             | 24 h          | 37 °C<br>98 °F | Data indicate that Wogonin activated the autophagic process in a time-dependent manner in NPC cells.                                              |
| Huang, et al, 2019/ China         | Icariin         | HeLa                                               | Cervical                                  | Cells not treated with Icariin                                                                               | <i>In vitro</i>             | 24 h          | 37 °C<br>98 °F | Icariin treatment caused dose-dependent growth inhibition of the HeLa cell line.                                                                  |
| Jia S, et al, 2019/ China         | Fisetin         | PDAC - PANC-1 cells                                | Pancreatic                                | Cells incubated in PBS - negative control                                                                    | <i>In vivo and in vitro</i> | 72 h          | 37 °C<br>98 °F | The results showed that fisetin increased the autophagic flux in PANC-1 cells.                                                                    |
| Lee HJ, et al, 2018/ South Korea  | PEC             | MKN28                                              | Gastric                                   | Non-use of PEC                                                                                               | <i>In vitro</i>             | 24 h          | 37 °C<br>98 °F | PEC may be an alternative therapeutic agent for human gastric carcinoma.                                                                          |
| Li F, et al, 2015 / China         | Silibinin       | RCC ACHN and 786-O cells                           | Kidney                                    | Vehicle treated cells (DMSO)                                                                                 | <i>In vitro</i>             | 24-48 h       | 37 °C<br>98 °F | The induction of autophagy by silibinin contributes positively in renal cell carcinoma.                                                           |
| Wang S, et al, 2019/ China        | Sotetsu Flavone | NSCLC ( <i>in vivo</i> and <i>in vitro</i> ) cells | Lung                                      | Non-use of sotetsu flavone                                                                                   | <i>In vivo and in vitro</i> | 24 h          | 37 °C<br>98 °F | Sotetsu Flavone induces autophagy in NSCLC cells through its effects after blocking PI3K/AKT/mTOR signaling pathways.                             |
| Zou M, et al, 2012                | Oroxylin A      | HepG2 cells                                        | Liver                                     | Non-use of Oroxylin A                                                                                        | <i>In vivo and in vitro</i> | 24 h          | 37 °C<br>98 °F | Oroxylin A inhibited xenograft tumor growth and induced obvious autophagy in the tumors.                                                          |
